# Supplementary material
Source: PubMed Central journal article supplement (PMC6214798)
Supplement: NIHMS964594-supplement-supp_info.pdf [file NIHMS964594-supplement-supp_info.pdf]

## Supplemental Data

**Fig S1. Acetylation patterns of eight gonococcal strains.** Ngo cells were grown in supplemented GCB to  $OD_{600} = 0.4$  and lysed in SDS-PAGE buffer. Whole cell lysates of strains 1291, PID2, FA1090, MS11, 4505, 8551, WS-1, and 1342 (lanes 1-8, respectively) were separated on an acrylamide gel and immunoblotted with an antibody specific to acetylated lysine (mAb Ac-K-103).

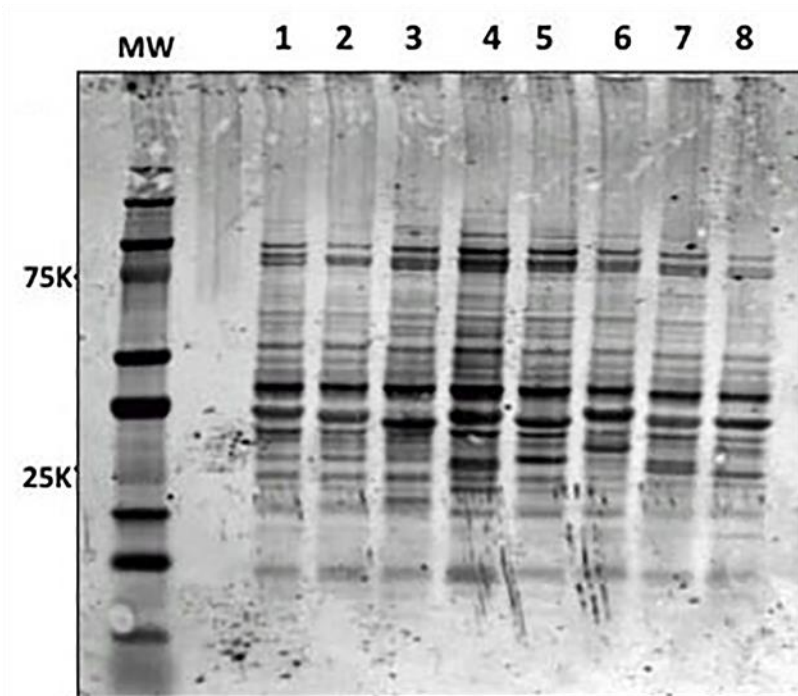

**Fig S2. Translated *pilT* and *pilU* suppressor mutations in *pilT*<sub>K117Q</sub> transformants.** (A) Alignment of wt PilT and PilT<sub>Δ108-111,K117Q</sub> (mutated\_T) sequences; K117, red; Walker box A motif, magenta; Walker box B motif, cyan; other acetyltable lysines, yellow. (B) Predicted structure of PilT<sub>Δ108-111,K117Q</sub>; Q117, red; Walker box A motif, magenta; Walker box B motif, cyan. Arrowhead indicates the position of Q117. (C) Alignment of wt PilU and PilU (truncated\_U) in one *pilT*<sub>K117Q</sub> transformant; Walker box A motif, magenta; Walker box B motif, cyan; acetyltable lysines, yellow.

**A**

```
mutated_T      MQITDLLAFGAKNKASDLHLSSGISPMIRVHGMRRINLPMSAEEVGNMVTSMNDHQ 60
Pilt_Ngo      MQITDLLAFGAKNKASDLHLSSGISPMIRVHGMRRINLPMSAEEVGNMVTSMNDHQ 60
*****

mutated_T      KIQQNLEVDVDFSELPNVARFRVNAFNTGRGPAAVFRTIPSTVLSLE----PSIFQQIAE 116
Pilt_Ngo      KIQQNLEVDVDFSELPNVARFRVNAFNTGRGPAAVFRTIPSTVLSLEELKAPSIFQKIAE 120
*****:***

mutated_T      SPRGMVLVTGPTGSGKSTTLAAMINYINETQPAHILTIEDPIEFVHQSKKSLINQRELHQ 176
Pilt_Ngo      SPRGMVLVTGPTGSGKSTTLAAMINYINETQPAHILTIEDPIEFVHQSKKSLINQRELHQ 180
*****

mutated_T      HTLSFANALSSALREDPDVILVGE MRDPETIGLALTA AETGHLVFGTLHTTGAAKTVDRI 236
Pilt_Ngo      HTLSFANALSSALREDPDVILVGE MRDPETIGLALTA AETGHLVFGTLHTTGAAKTVDRI 240
*****

mutated_T      VDVFPAGEKEMVRSMLSESLTAVISQNLKTHDGNGRVASHEILIANPAVRNLIRENKIT 296
Pilt_Ngo      VDVFPAGEKEMVRSMLSESLTAVISQNLKTHDGNGRVASHEILIANPAVRNLIRENKIT 300
*****

mutated_T      QINSVLQTGQASGMQTM DQSLQSLVRQGLIAPEAARRRAQNSESMSF 343
Pilt_Ngo      QINSVLQTGQASGMQTM DQSLQSLVRQGLIAPEAARRRAQNSESMSF 347
*****
```

**B**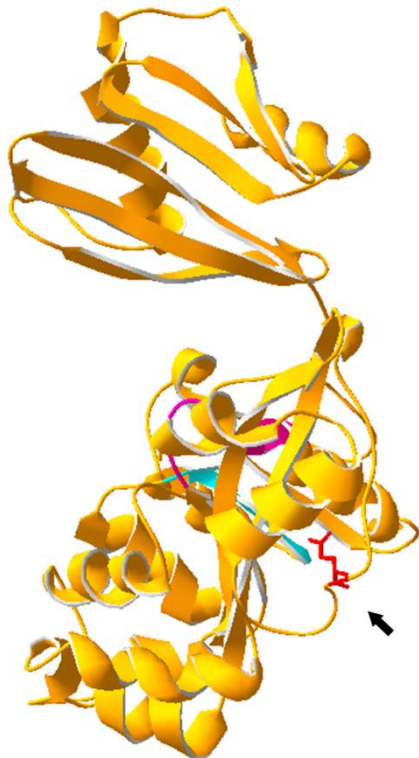

C

```
truncated_U      MNTDNLHDILDETVQVYSQKKQSRSETPAEIGTHFHPLLDRLCETAEAQNASDILISKGF 60
PilU_Ngo         MNTDNLHDILDETVQVYSQKKQSRSETPAEIGTHFHPLLDRLCETAEAQNASDILISKGF 60
*****

truncated_U      PPSLKINSALTPQPQKALTGEETAIAAIAASTMNAEQSEIFRRDGEINYSVQSRSGTRYRAN 120
PilU_Ngo         PPSLKINSALTPQPQKALTGEETAIAAIAASTMNAEQSEIFRRDGEINYSVQSRSGTRYRAN 120
*****

truncated_U      AYHSQGSAGLVLRRIHVIPQMRELGLPEKLDLAVAPRGLLIIVGPTGSGKSTTMATML 180
PilU_Ngo         AYHSQGSAGLVLRRIHVIPQMRELGLPEKLDLAVAPRGLLIIVGPTGSGKSTTMATML 180
*****

truncated_U      EHRNKTTLAR-----PYRYHRR-----PD----- 198
PilU_Ngo         EHRNKTLPGHIVTIEDPIEFYKPRRCIFTQREIGVDTINWQTAVQNAMRQSPDVVCIGE 240
*****.           : *: *                               **

truncated_U      -----
PilU_Ngo         VRSRESMEYAMQLAQTGHLICIFTLHANTAPQSLERILNFPKEQHNQILIDIALNLTGII 300

truncated_U      -----
PilU_Ngo         CQRLALKKDKTGRTAVVDLLINTPAIQDFILKGDLMNISKIMETAKTDGMQTMQNLFEL 360

truncated_U      -----
PilU_Ngo         YRHGIISYEEALRQSVSANNLRLHIQLHKEGKTPELLYDRVNGLNLIS 408
```

**Fig S3. PilE levels in wt,  $\Delta pilT$ , and  $ipilE$ .** Cells were grown in the absence of IPTG and whole cell lysates were separated by 15% SDS-PAGE and immunoblotted with a monoclonal antibody to PilE (SM1).

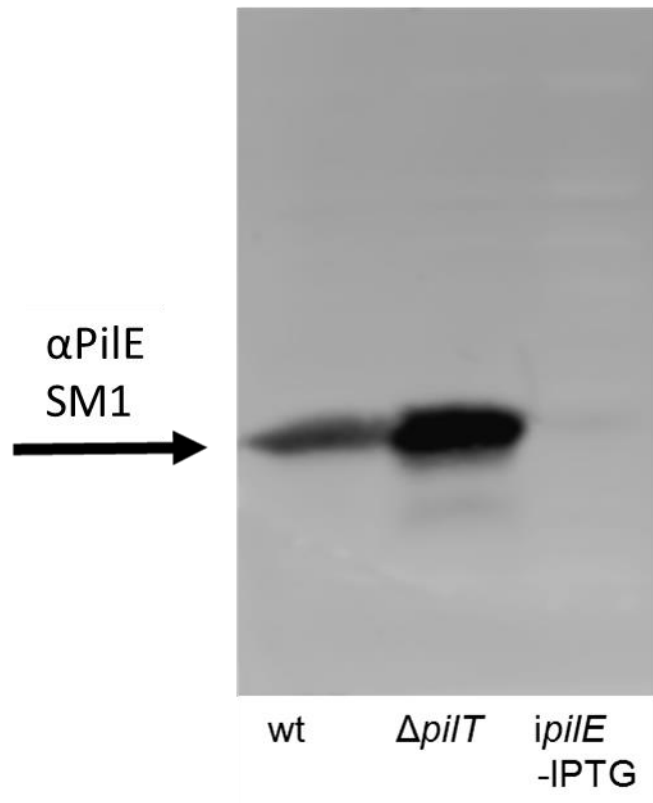

**Fig S4. Translated *pilU* suppressor mutations in a pilated *ipilE pilT*<sub>K117Q</sub> clone.** Walker box A motif, magenta; Walker box B motif, cyan; missense mutation, green; acetylatable lysines, yellow.

```

PilU_Ngo      MNTDNLHDILDETVQVYSQKKQSRSETPAEIGAHFHPLLDRLCETAE AQNASDILISKGF
PilU_trunc    MNTDNLHDILDETVQVYSQKKQSRSETPAEIGAHFHPLLDRLCETAE AQNASDILISKGF
*****

PilU_Ngo      PPSLKINSALTPQPQKALTGEE TAAIAASTMNAEQSEIFRRDGEINYSVQSRSGTRYRAN
PilU_trunc    PPSLKINSALTPQPQKALTGEE TAAIAASTMNAEQSEIFRRDGEINYSVQSRSGTRYRAN
*****

PilU_Ngo      AYSQGSAGLVLRRLINHVIPQMRELGLPEKLDLAVAPRGLLIIVGPTGSGKSTTMATML
PilU_trunc    AYHSQGSAGLVLRRLINHVIPQMRELGLPEKLDLAVAPRGLLIIVGPTGSGKSTTMATML
**.*

PilU_Ngo      EHRNKTLPGHIVTIEDPIEFYKPRRCIFTQREIGVDTINWQTAVQNAMRQSPDVVCIGE
PilU_trunc    EHRNKTLPGHIVTIEDPIEFYKPRRCIFTQREIGVDTINWQTAVQNAMRQSPDVVCIGE
*****

PilU_Ngo      VRSRESMEYAMQLA-QTGHLCIFTLHANTAPQ--SLERIL-NFYPKEQHNQILIDIALNL
PilU_trunc    VRSRESMEYAMQLRPKPGHICMFLRSPANTGA AVASERILQLSYP-----
***** * : ** * * .: : **** **

PilU_Ngo      TGIICQRLALKKDKTGRTAVVDLLINTPAIQDFILKGDLMNISKIMETAKTDGMQTMQDN
PilU_trunc    -----

PilU_Ngo      LFELYRHGIISYEEALRQSVSANNLRLHIQLHKEGKTPELLYDRVNGLNLIS
PilU_trunc    -----

```

**Fig S5. Detection of H.8 and GAPDH in cytosolic/periplasmic and inner/outer membrane fractions isolated from Ngo wt,  $\Delta pilT$ ,  $\Delta pilE$ ,  $ipilE$  (-IPTG),  $ipilE pilT_{K117Q}$ , and  $ipilE pilT_{K117R}$ .** Fractions were separated by 15% SDS-PAGE and immunoblotted with a monoclonal antibody to H.8 and a polyclonal antibody to GAPDH to assess fraction purity.

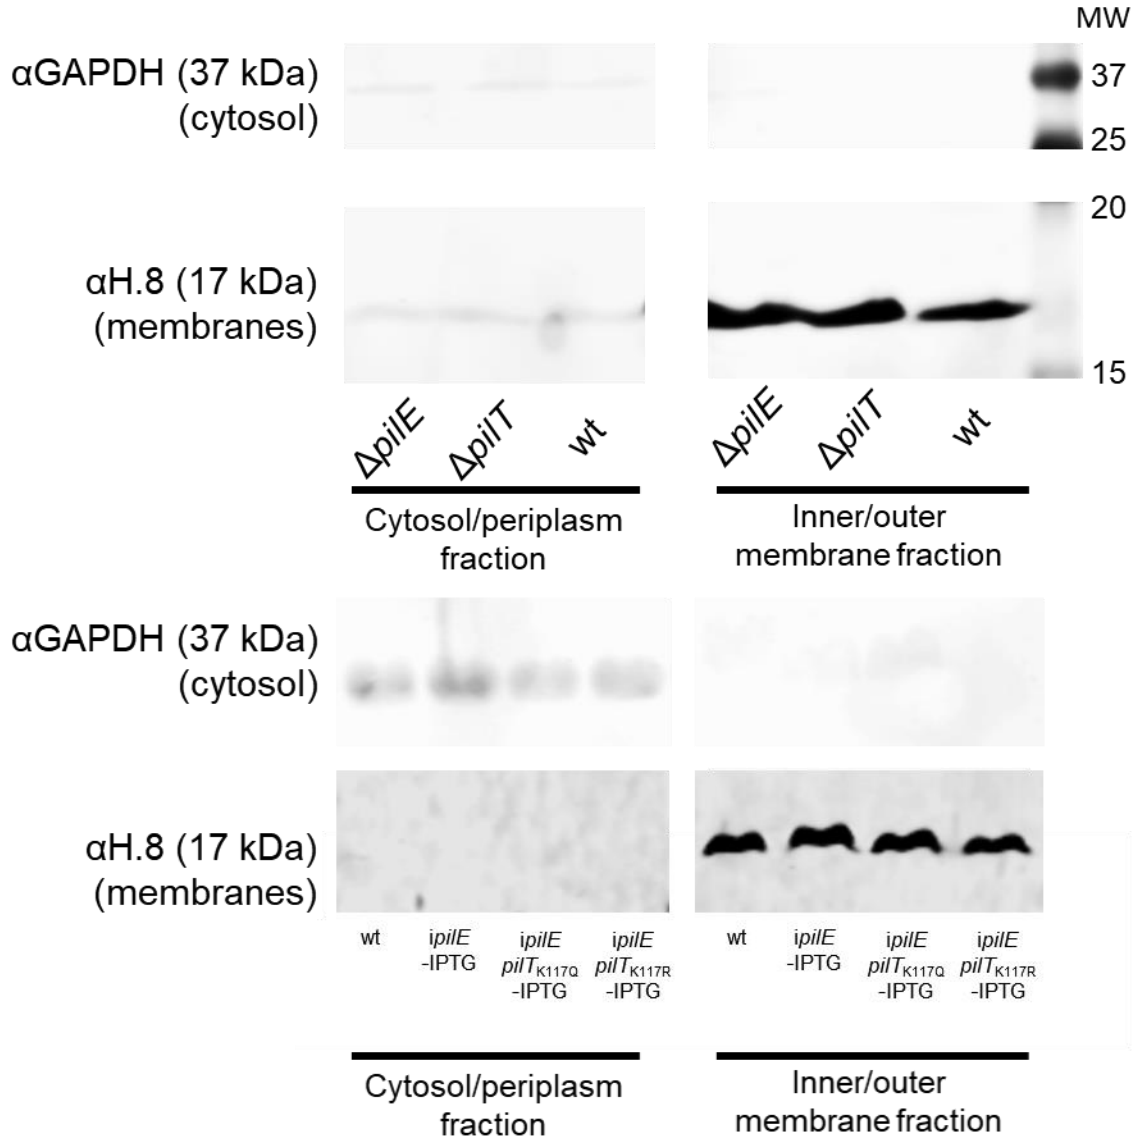

Fig S6. Plasmid map of *pilT* mutagenesis construct

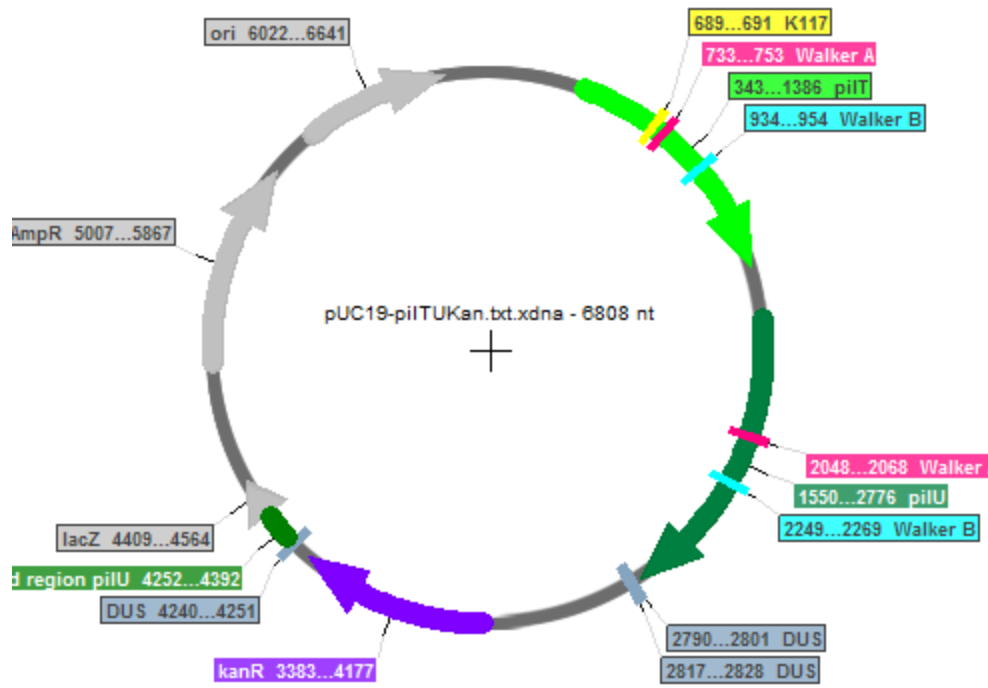

| Strain                    | Transformation frequency*        |
|---------------------------|----------------------------------|
| wt                        | 6.89 x 10 <sup>-4</sup> (± 2.63) |
| $\Delta pilT$             | < 6.16 x 10 <sup>-6</sup> **     |
| <i>ipilE</i> + IPTG       | 2.01 x 10 <sup>-4</sup> (± 0.62) |
| <i>ipilE</i> K117Q + IPTG | 4.35 x 10 <sup>-4</sup> (± 0.96) |
| <i>ipilE</i> K117R + IPTG | 6.81 x 10 <sup>-4</sup> (± 0.96) |

**Table S1. Transformation frequency of *ipilE pilT*<sub>K117Q</sub> and *ipilE pilT*<sub>K117R</sub> strains.**

\*Transformation frequency = Rif<sup>R</sup> cfu/total input cfu/mg Rif<sup>R</sup> genomic DNA. Values are the average of 3 independent experiments ± SEM; Student's two-tailed t-test. \*\*Limit of detection.

**Table S2. Primers used in this study**

| Primer pair        | Use                                                                                                                              | Sequence                                                                                                                                              |
|--------------------|----------------------------------------------------------------------------------------------------------------------------------|-------------------------------------------------------------------------------------------------------------------------------------------------------|
| AH64F<br>AH64R     | Amplification of Ngo<br><i>pilT</i> for cloning into<br>pET28a                                                                   | agtcaggctagcATGCAGATTACCGACTTACTCGC<br>ctgactggatccTTCCTGTTCGGAAGGGTATG                                                                               |
| K117QF<br>K117QR   | <i>pilT</i> mutagenesis                                                                                                          | AGAATTGAAAGCCCCGAGCATTTTCCAACA<br>AATCGCAGAATCGCCGCGCGGCATGGT<br>ACCATGCCGCGCGGCATTCTGCGATTTGTT<br>GGAAAATGCTCGGGGCTTTCAATTCT                         |
| K117RF<br>K117RR   | <i>pilT</i> mutagenesis                                                                                                          | AGAATTGAAAGCCCCGAGCATTTTCCAACG<br>TATCGCAGAATCGCCGCGCGGCATGGT<br>ACCATGCCGCGCGGCATTCTGCGATACGTT<br>GGAAAATGCTCGGGGCTTTCAATTCT                         |
| AH 106F<br>AH 106R | Amplification of<br><i>pilTU</i>                                                                                                 | TCAGGGCGGTATAATCAAGG<br>tgatgaggatccGGAAGCGAGGTAATGAGCAG                                                                                              |
| AH107F<br>AH107R   | Amplification of <i>kan</i>                                                                                                      | tgatgaggatccGAGTCAGTGAGCGAGGAAGC<br>ttcagacggcatGAAATCTCGTGATGGCAGGT                                                                                  |
| AH108              | 3' <i>pilU</i> UTR sequence<br>used to promote<br>recombination of the<br>construct with the<br>endogenous <i>pilTU</i><br>locus | AGGCCCGCCGGCGATGATGCCGAGTACGAAG<br>GGCATGGCGAGCTTGGGTTCGCCTAGCTGCC<br>AGACGATGGAGGCGGCGGTAAAGACACTGG<br>CGAAAACGGttcagacggcatGAAATCTCGTGATG<br>GCAGGT |



**Table S3. Plasmids used in this study**

| <b>Plasmid</b>                                         | <b>Use</b>                                        |
|--------------------------------------------------------|---------------------------------------------------|
| pET28a- <i>pilT</i>                                    | Vector used to overexpress His <sub>6</sub> -PilT |
| pUC19- <i>pilT</i> <sub>K117Q</sub> , <i>pilU</i> -kan | Vector used to transform K117Q into Ngo           |
| pUC19- <i>pilT</i> <sub>K117R</sub> , <i>pilU</i> -kan | Vector used to transform K117R into Ngo           |
